# Supplementary material for: Dynamics of SARS-CoV-2 Spike-IgG throughout Three COVID-19 Vaccination Regimens: A 21-Month Longitudinal Study of 82 Norwegian Healthcare Workers
Source: MDPI journal article supplement (doi:10.3390/v15030619), 2023-02-23
Supplement: s1 [file s1]

**Table S1. P-values**

|                         | <b>P-values</b><br><b>Pz-short - Az-Pz</b> | <b>P-values</b><br><b>Pz-short - Pz-long</b> | <b>P-values</b><br><b>Az-Pz - Pz-long</b> | <b>P-values</b><br><b>Kruskal-Wallis chi-squared</b><br><b>test all three groups</b> |
|-------------------------|--------------------------------------------|----------------------------------------------|-------------------------------------------|--------------------------------------------------------------------------------------|
| <b>1st vaccine dose</b> |                                            |                                              |                                           |                                                                                      |
| 13-21 days              | 3.7e-5                                     | 0.6769                                       | 9.1e-4                                    | 1.4e-4                                                                               |
| <b>2nd vaccine dose</b> |                                            |                                              |                                           |                                                                                      |
| 13-21 days              | 6.1e-7                                     | 1.9e-5                                       | 0.3124                                    | 4.65e-8                                                                              |
| 80-120 days             | 1.0e-3                                     | 0.1976                                       | 0.07706                                   | 3.0e-3                                                                               |
| 170-220 days            | 0.2282                                     | 0.411                                        | 0.9333                                    | 0.4234                                                                               |
| <b>3rd vaccine dose</b> |                                            |                                              |                                           |                                                                                      |
| 13-21 days              | 0.1866                                     | 0.21                                         | 0.5512                                    | 0.2702                                                                               |
| 80-120 days             | 1.6e-2                                     | 0.09386                                      | 0.8371                                    | 4.3e-2                                                                               |
| 170-220 days            | 0.1797                                     | 0.8571                                       | 0.4286                                    | 0.2955                                                                               |

The Wilcoxon rank sum test together with the Kruskal-Wallis chi-squared test were used to compare antibody levels between groups within each time interval. Significant p-values are shown as exponential numbers.

**Table S2. The number of participants with serum samples after the third dose, and the share receiving mRNA-1273**

|                     | <b>Pz-short</b> | <b>Az-Pz</b> | <b>Pz-long</b> | <b>Total</b> |
|---------------------|-----------------|--------------|----------------|--------------|
| <b>13-31 days</b>   | 23              | 16           | 10             | 49           |
| <b>mRNA-1273</b>    | 3 (13%)         | 1 (6%)       | 2 (20%)        | 6 (12%)      |
| <b>80-120 days</b>  | 8               | 9            | 7              | 16           |
| <b>mRNA-1273</b>    | 1 (13%)         | 1 (11%)      | 1 (14%)        | 3 (19%)      |
| <b>170-220 days</b> | 6               | 6            | 2              | 14           |
| <b>mRNA-1273</b>    | 0               | 1 (17%)      | 1 (50%)        | 2 (14%)      |
