# Supplementary figures and images for: Dynamics of SARS-CoV-2 Spike-IgG throughout Three COVID-19 Vaccination Regimens: A 21-Month Longitudinal Study of 82 Norwegian Healthcare Workers
Source: MDPI journal article supplement (doi:10.3390/v15030619), 2023-02-23

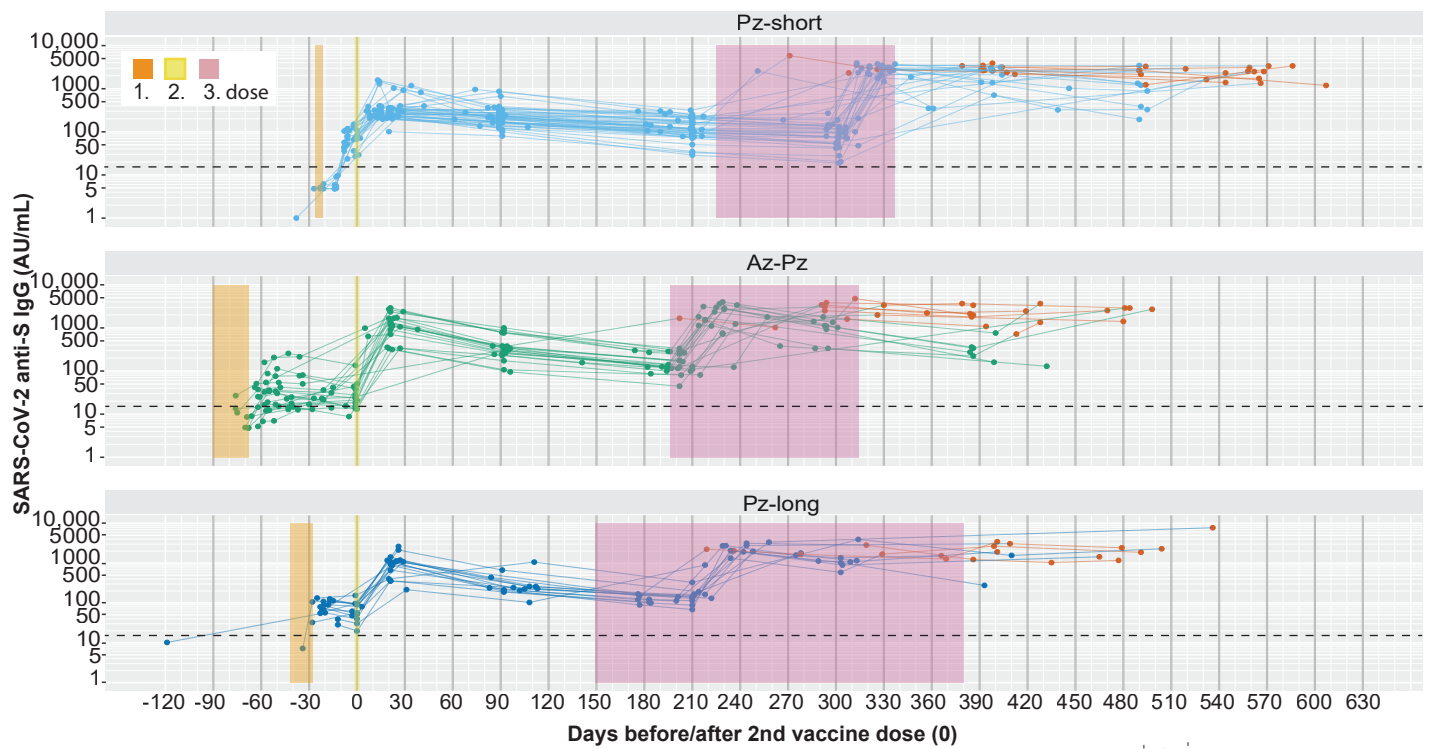

Supplement: s1 [file s1]

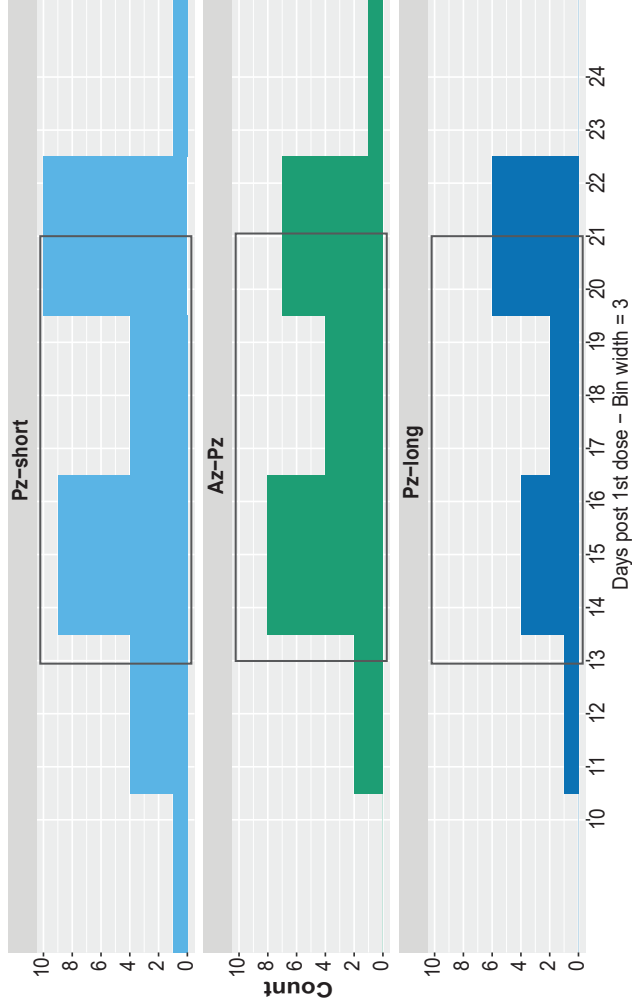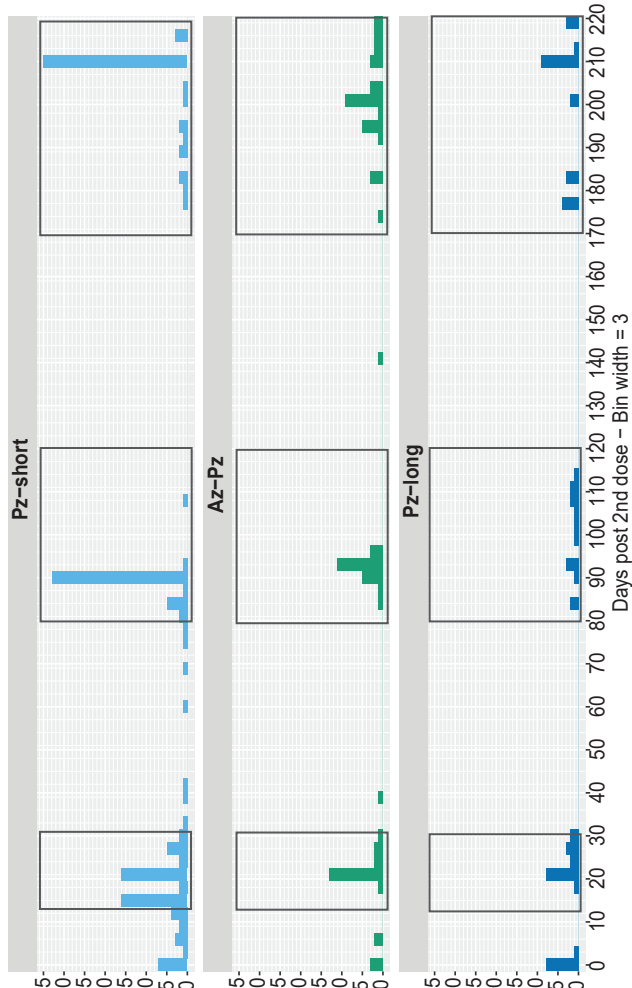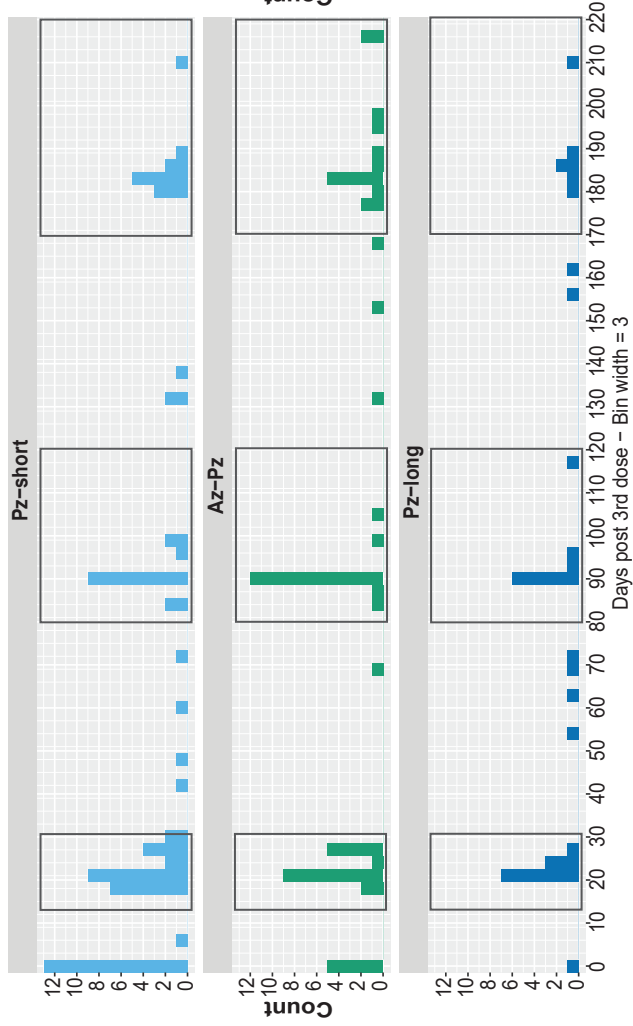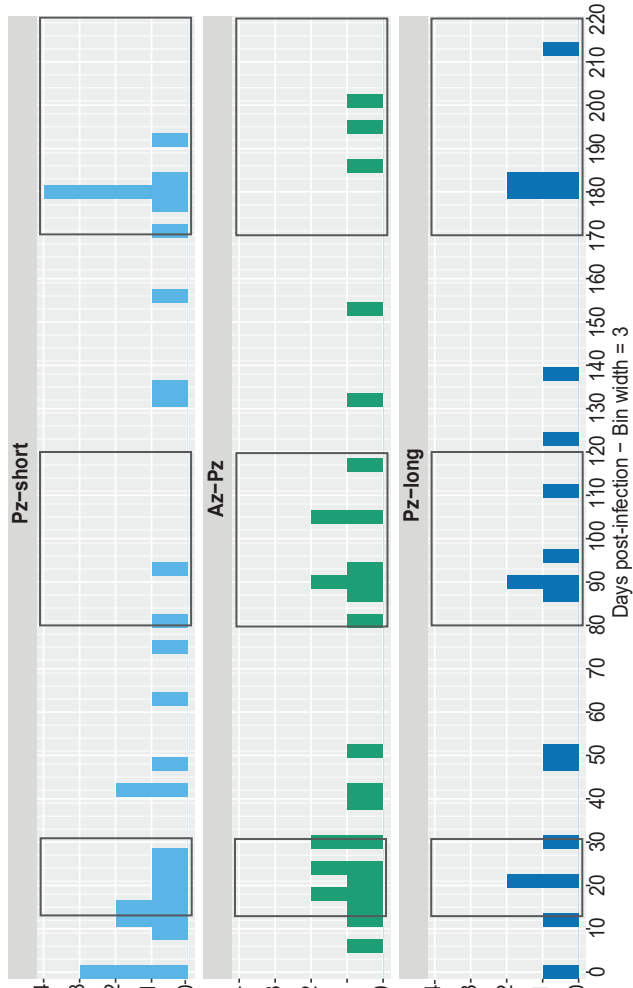

Supplement: s1 [file s1]
